# Supplementary material
Source: PubMed Central journal article supplement (PMC3073338)
Supplement: rna0706_0803SD1.pdf [file rna0706_0803SD1.pdf]

## SUPPLEMENTARY FIGURES &amp; TABLE

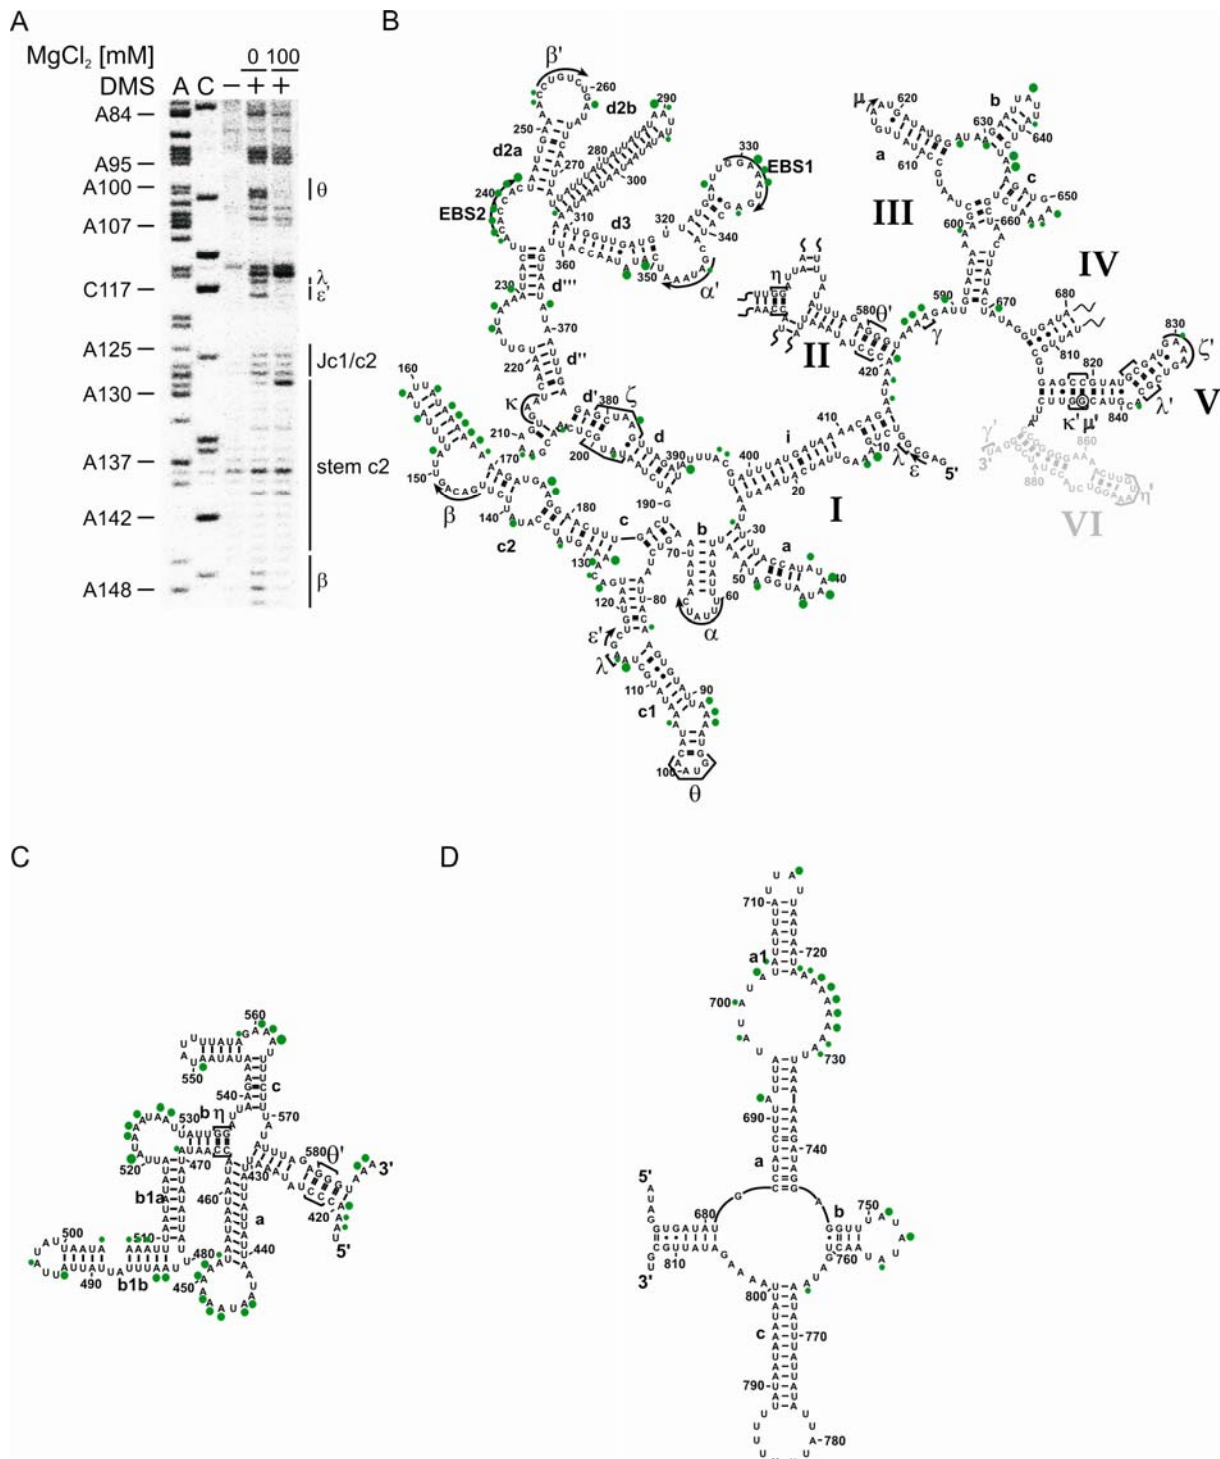

Supplementary Figure 1. Structural probing of the D123456 ai5 $\gamma$  ribozyme *in vitro*. (A) Representative primer extension gel showing the *in vitro* DMS modification pattern of the

ai5γ D123456 ribozyme – region at the c-c1-c2 three-way junction. This ribozyme construct resembles the spliced intron, as it contains all intron domains in their full length, but the exon sequences were deleted. A and C denote sequencing lanes. In the – lane natural stops of the Reverse Transcriptase are seen. In the + lanes the *in vitro* DMS pattern of the unfolded ribozyme (in the absence of  $Mg^{2+}$ ) and of the folded RNA (in 100mM  $Mg^{2+}$ ) is shown. (B) Summary map for the folded RNA (in 100mM  $Mg^{2+}$ ): residues methylated by DMS *in vitro* are indicated with green filled circles. The size of the filled circles correlates with the relative modification intensity of individual bases. Notably, in the D123456 ribozyme domain 6 was not mapped, as it served as primer binding site to map the very 3' part of the intron. (C) Summary map of D2: residues methylated by DMS *in vitro* are indicated with green filled circles. The size of the filled circles correlates with the relative modification intensity of individual bases. (D) Summary map of D4: residues methylated by DMS *in vitro* are indicated with green filled circles. The size of the filled circles correlates with the relative modification intensity of individual bases.

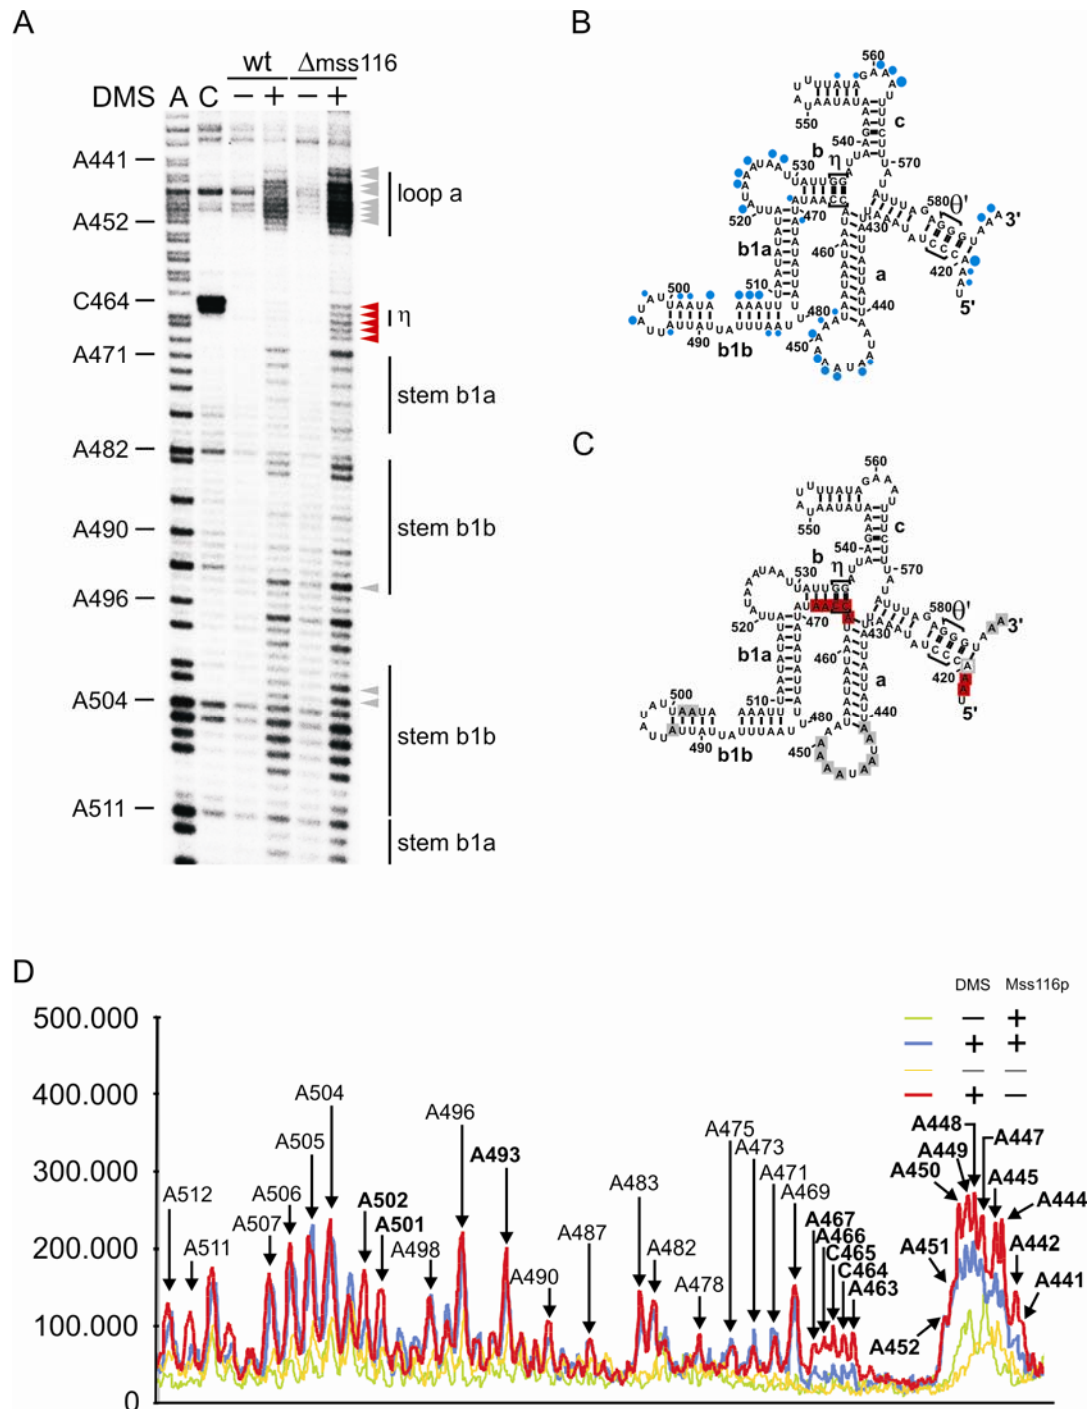

Supplementary Figure 2. Domain 2. (A) Representative gel showing the accessibility of residues in domain 2 in the wt and *mss116*-knockout strain. D2 harbors the tetraloop-receptors  $\theta'$  and  $\eta$  forming long-range tertiary contacts with stem c1 in D1 and D6, respectively. Lanes are designated as in Fig. 1; symbol code as in Fig. 3. (B) Summary map of D2 in which residues methylated by DMS in the wt strain are indicated with blue filled circles. The size of

the filled circles correlates with the relative modification intensity of individual bases. (C) Differential summary map of D2: bases, the modification intensity of which changes in the absence of Mss116p, are highlighted. The closed squares indicate an increase in accessibility, while open squares represent bases with reduced accessibility in the absence of Mss116p. Strong changes in accessibility are displayed in red (>2-fold); while smaller changes are shown in gray (1.5 to 2-fold). (D) The normalized plot displays the modification intensity of nucleotides shown in the gel in panel (A) in the wt strain (blue) and *mss116*-knockout strain (red). The respective RT stop controls are shown in green and yellow, respectively. Nucleotides whose modification intensity changes in the absence of Mss116p are labeled in bold. In contrast, A469, A483, A496, A498 and A504-A507 remain equally modified in both strains and were therefore used for normalization.

©2010 Landes Bioscience.  
Do not distribute.

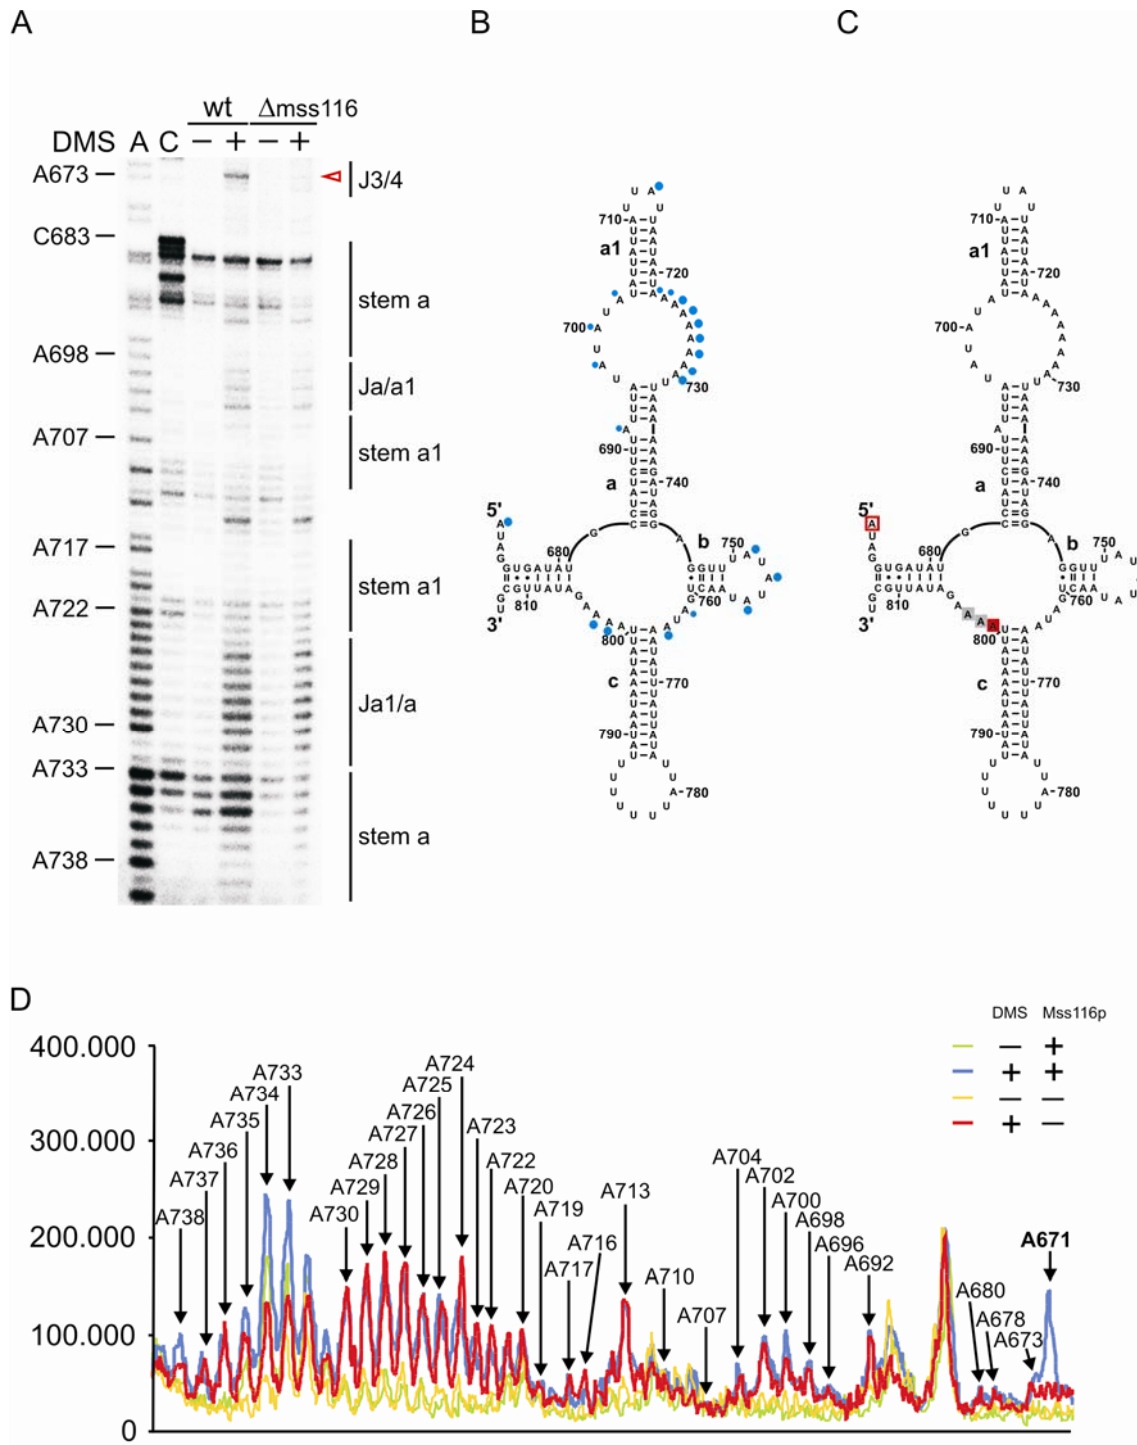

Supplementary Figure 3. Domain 4. (A) Representative gel showing the accessibility of residues in domain 4 in the wt and *mss116*-knockout strain. Lanes are designated as in Fig. 1; symbol code as in Fig. 3. (B) Summary map of D4 in which residues methylated by DMS in the wt strain are indicated with blue filled circles. The size of the filled circles correlates with

the relative modification intensity of individual bases. (C) Differential summary map of D4: bases, the modification intensity of which changes in the absence of Mss116p, are highlighted. The closed squares indicate an increase in accessibility, while open squares represent bases with reduced accessibility in the absence of Mss116p. Strong changes in accessibility are displayed in red (>2-fold); while smaller changes are shown in gray (1.5 to 2-fold). (D) The normalized plot displays the modification intensity of nucleotides shown in the gel in panel (A) in the wt strain (blue) and *mss116*-knockout strain (red). The respective RT stop controls are shown in green and yellow, respectively. Nucleotides whose modification intensity changes in the absence of Mss116p are labeled in bold. In contrast, A692, A702, A713, A725-A730, and A736-A737 remain equally modified in both strains and were therefore used for normalization.

©2010 Landes Bioscience.  
Do not distribute.

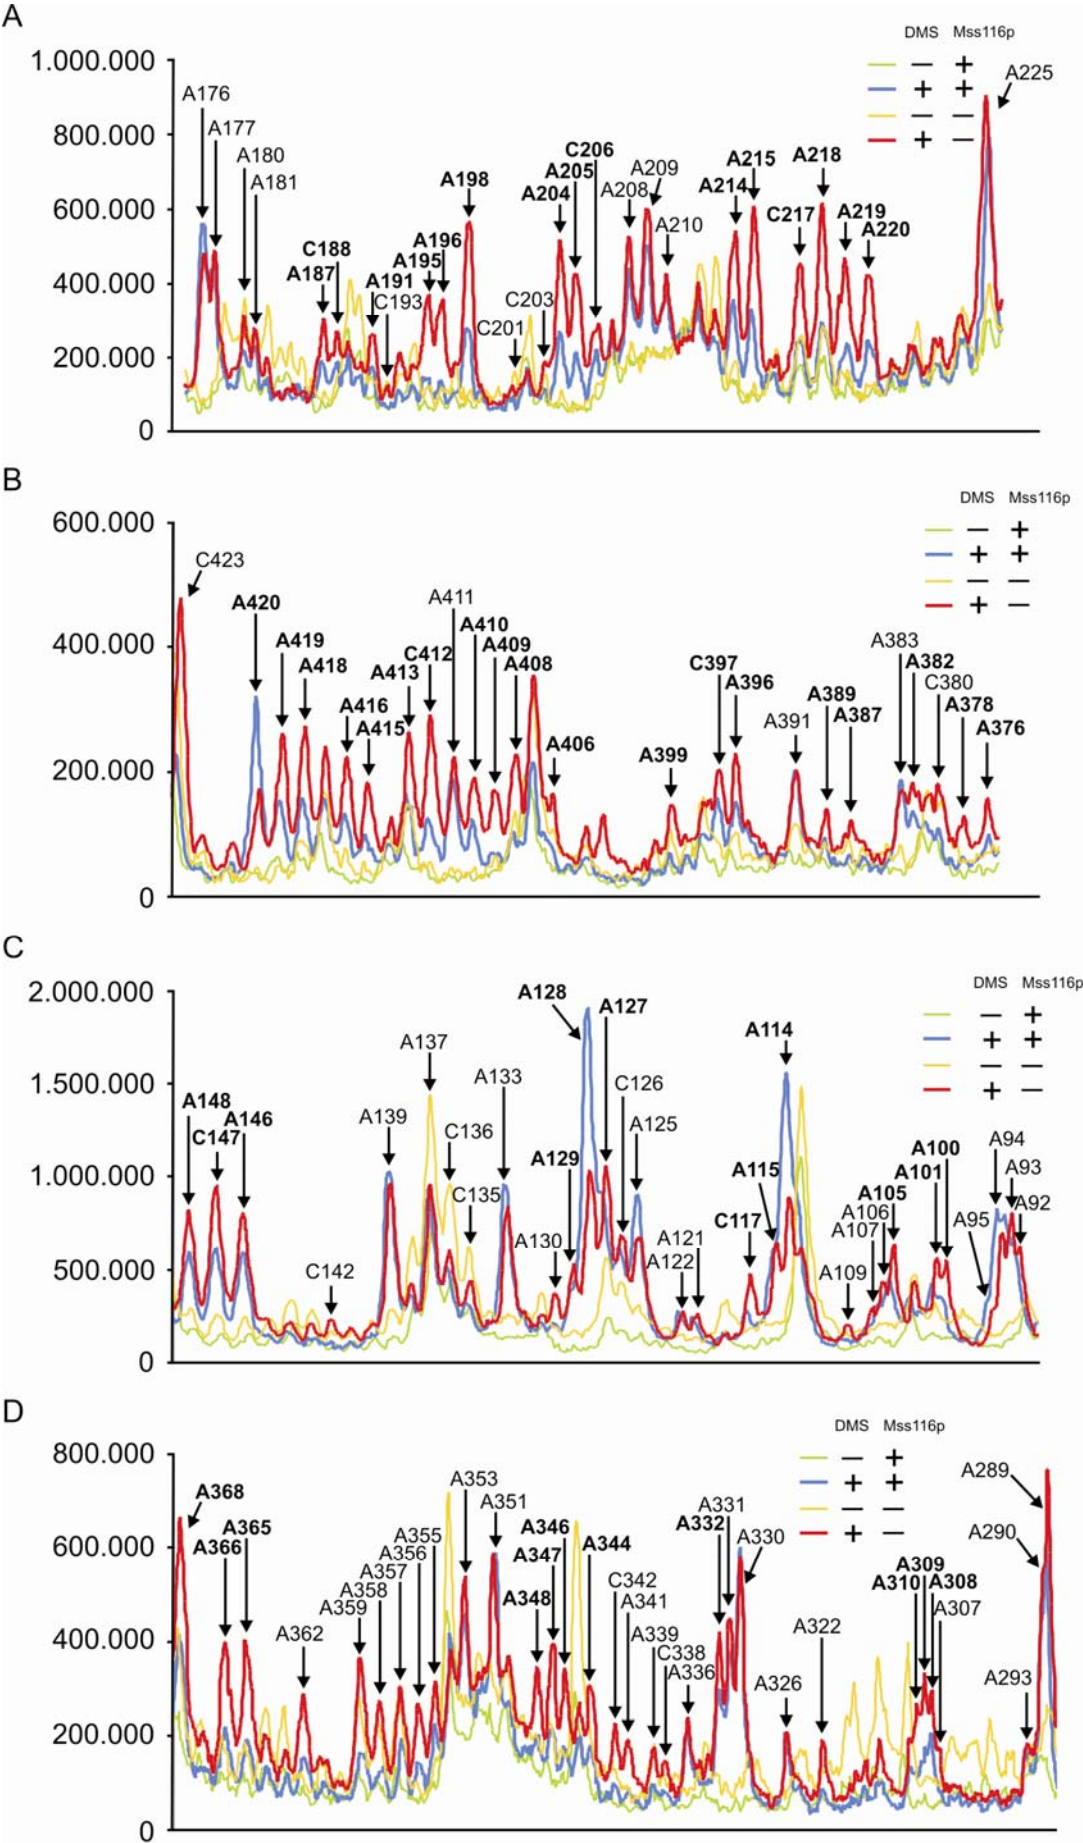



Supplementary Figure 4. Mss116p promotes formation of the  $\kappa$ - $\zeta$  element *in vivo*. Normalized plots are shown for the representative gels shown in Figs. 3 and 4. Comparable plots were prepared for all gels (and for at least three independent experiments) and the data were summarized in the differential maps shown in Fig. 5 and Supplementary Figs. 2C and 3C. (A) The plot shows the modification intensity of nucleotides in the 5' part the  $\kappa$ - $\zeta$  element in the wt strain (blue) and *mss116*-knockout strain (red). The respective RT stop controls are shown in green and yellow, respectively. Nucleotides whose modification intensity changes in the absence of Mss116p are labeled in bold. In contrast, A176-A177, A208-A210 and A225 remain equally modified in both strains and were therefore used for normalization. (B) The plot shows the modification intensity of nucleotides in the 3' part the  $\kappa$ - $\zeta$  element in both genetic backgrounds. Color code as in (A). Again, nucleotides whose modification intensity changes in the absence of Mss116p are labeled in bold. In contrast, A383, A391 and A411 remain equally modified in both strains and were therefore used for normalization. (C) The plot shows the modification intensity of nucleotides in the c-c1-c2 three-way junction, which harbors the  $\theta$ ,  $\lambda$ ,  $\epsilon'$  and  $\beta$  elements forming long-range tertiary contacts with distinct regions of the intron, in both genetic backgrounds. Color code as in (A). Again, nucleotides whose modification intensity changes in the absence of Mss116p are labeled in bold. In contrast, A92-A94, A133 and A139 remain equally modified in both strains and were therefore used for normalization. (D) The plot shows the modification intensity of nucleotides in the in stem d3 including the exon binding site 1 (EBS1) and the  $\alpha'$  element, which forms an intra-domain contact with the closing loop of stem b, in both genetic backgrounds. Color code as in (A). Again, nucleotides whose modification intensity changes in the absence of Mss116p are labeled in bold. In contrast, A289-A290, A330-A331, A351 and A353 remain equally modified in both strains and were therefore used for normalization.



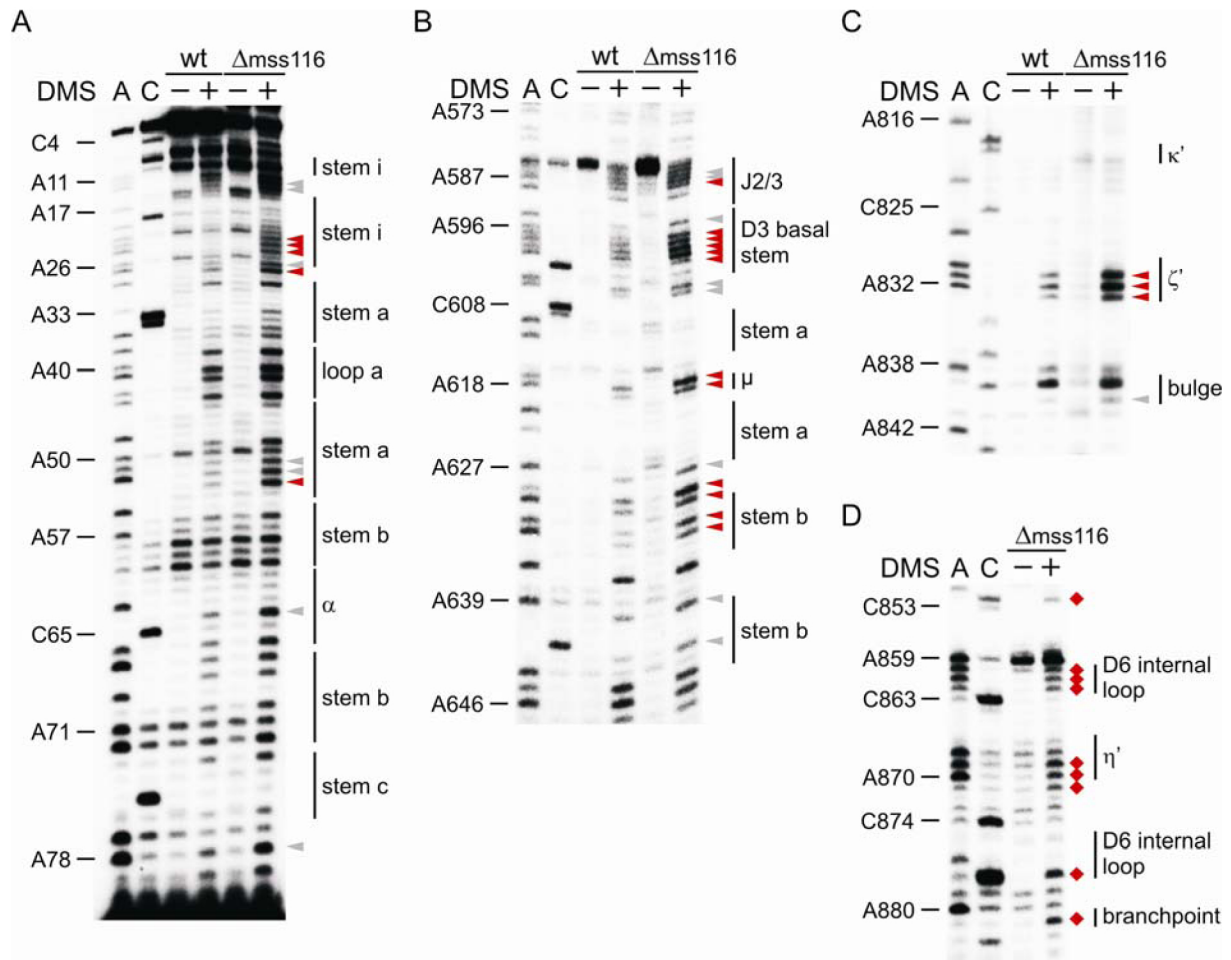

Supplementary Figure 5. Mss116p-induced conformational changes within the ai5 $\gamma$  intron *in vivo*. (A) Representative gel showing the accessibility of residues in stems a, b, c and i of D1 in the wt and *mss116*-knockout strain. Lanes are designated as in Fig. 1; symbol and color code as in Fig. 3. (B) Representative gel showing the accessibility of residues in J2/3 and domain 3 in the wt and *mss116*-knockout strain. Lanes are designated as in Fig. 1; symbol and color code as in Fig. 3. (C) Representative gel showing the accessibility of residues in domain 5 in the wt and *mss116*-knockout strain. Of particular interest are the dinucleotide bulge and the tetraloop  $\zeta'$ . Lanes are designated as in Fig. 1; symbol and color code as in Fig. 3. (D) Representative gel showing the *in vivo* DMS modification pattern of D6 of the ai5 $\gamma$  intron in the *mss116*-knockout strain. Sites of modification are indicated with a red diamond. The normalized plots derived from the gels of panel (A)-(C) are shown in Supplementary Fig. 6.

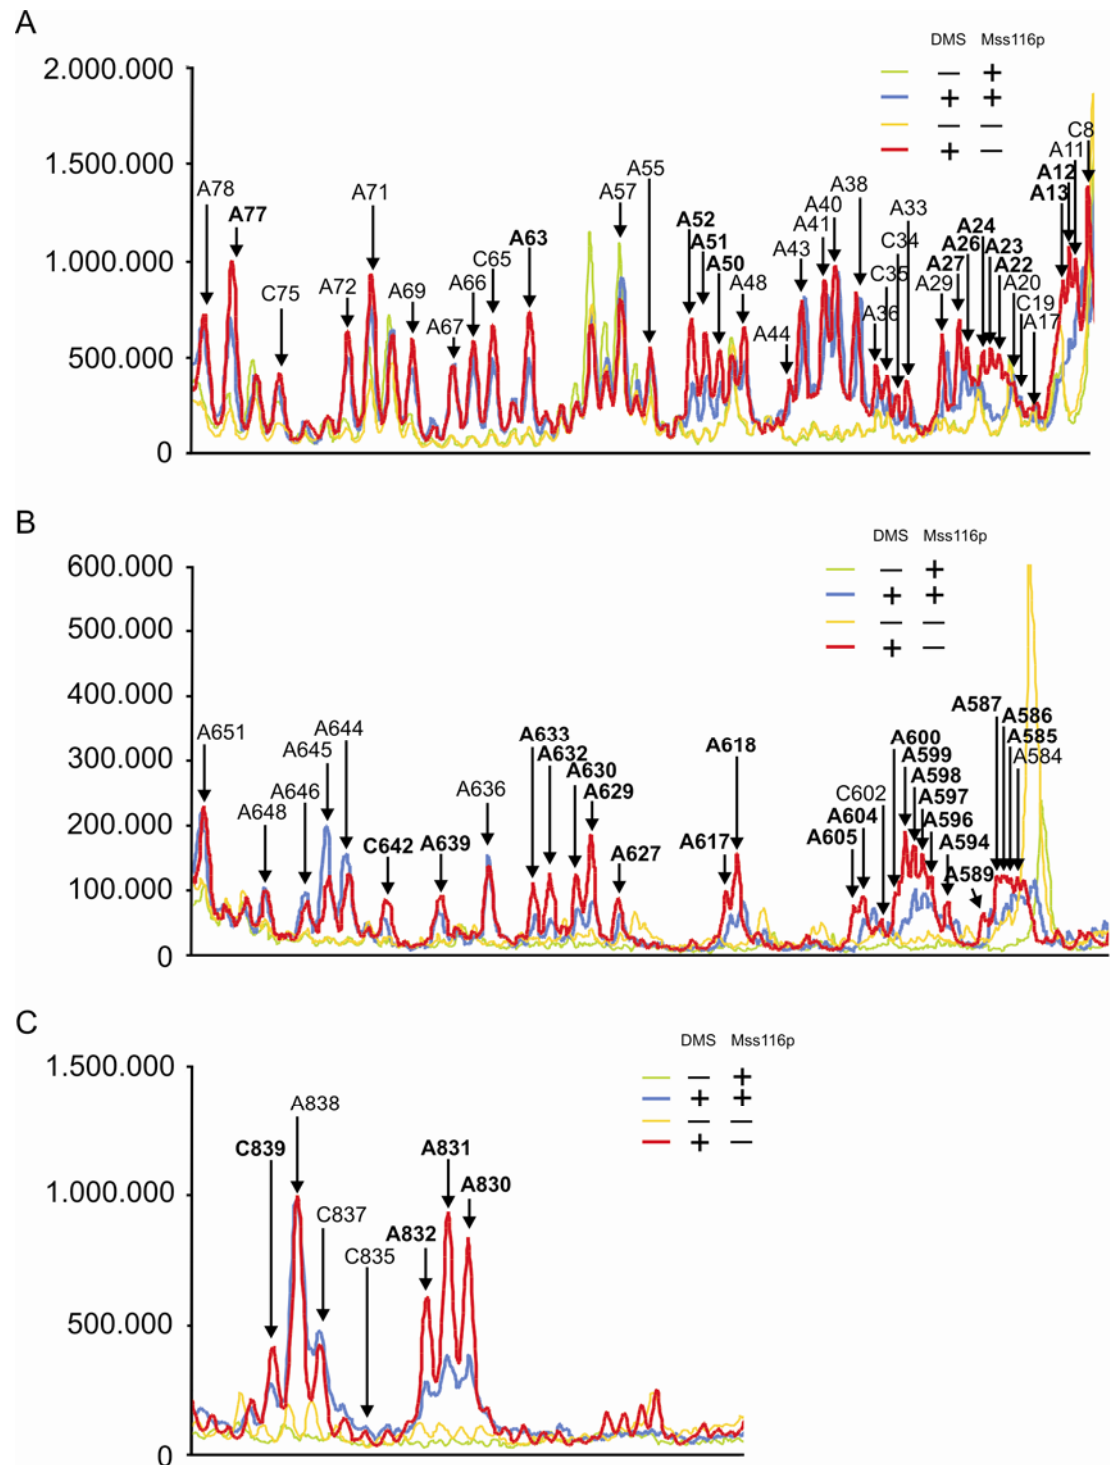

Supplementary Figure 6. Mss116p promotes formation of tertiary interactions *in vivo*. Normalized plots are shown for the representative gels shown in Supplementary Fig. 5. Comparable plots were prepared for all gels (and for at least three independent experiments) and the data were summarized in the differential maps shown in Fig. 5 and Supplementary Figs. 2C and 3C. (A) The plot shows the modification intensity of residues in stems a, b, c and

i of D1 in the wt strain (blue) and *mss116*-knockout strain (red). The respective RT stop controls are shown in green and yellow, respectively. Nucleotides whose modification intensity changes in the absence of Mss116p are labeled in bold. In contrast, A29, A38, A40-A41, A43, A55, A67, C75, and A78 remain equally modified in both strains and were therefore used for normalization. (B) The plot shows the modification intensity of residues in J2/3 and domain 3 in both genetic backgrounds. Color code as in (A). Again, nucleotides whose modification intensity changes in the absence of Mss116p are labeled in bold. In contrast, A636, A646, A648 and A651 remain equally modified in both strains and were therefore used for normalization. (C) The plot shows the modification intensity of residues in domain 5 in both genetic backgrounds. Color code as in (A). Again, nucleotides whose modification intensity changes in the absence of Mss116p are labeled in bold. In contrast, C837 and A838 remain equally modified in both strains and were therefore used for normalization.

©2010 Landes Bioscience.  
Do not distribute.

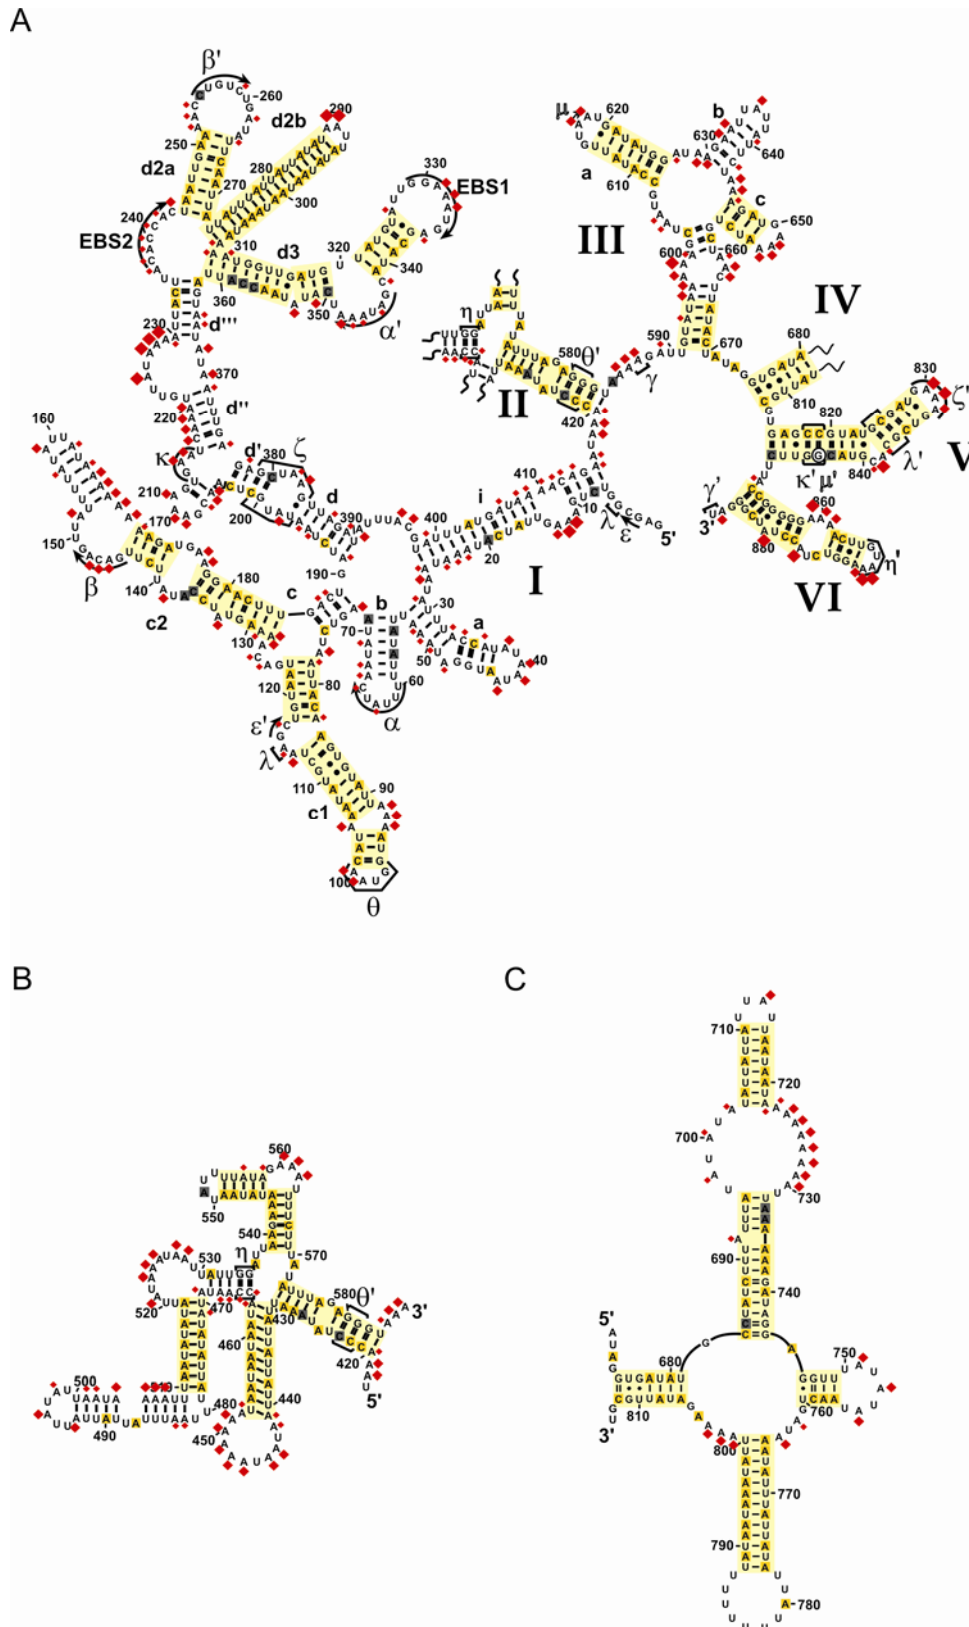

Supplementary Figure 7. In the absence of Mss116p the ai5 $\gamma$  intron does form most of the secondary structure but lacks its tertiary fold. (A) Summary map of residues methylated by DMS in the *mss116*-knockout strain (red filled diamonds), whereby the summary map of

Domain 2 is shown in (B) and that of Domain 4 in (C). The size of the filled diamonds correlates with the relative modification intensity of individual bases. Helical structures formed in the absence of Mss116p are highlighted in yellow (darker yellow boxes indicate the A and C residues that were not methylated). Gray shaded boxes indicate RT stops precluding obtaining information of these A and C residues.

©2010 Landes Bioscience.  
Do not distribute.

## Supplementary Table 1

Oligos used as primers in the reverse transcription reaction.

| Oligo <sup>a</sup> | Sequence (5' to 3')               |
|--------------------|-----------------------------------|
| Sc 82              | TGTTACCATTTTAATACACTTG            |
| Sc 160             | G TTCCTTCATCTTTTTTTTATAA          |
| Sc 234             | GTTTTCAATTAGTGGTGTAAG             |
| Sc 312             | TTCCAATACATAACATCAACC             |
| Sc 375             | GTAATATCTAACTTAGCTCTC             |
| Sc 440             | TTGGTATTATTATTATTTTTTTATTATTA     |
| Sc 520             | TATTTCTTAATCCAATAATTATTTATA       |
| Sc 588             | GCATTAGCTTTTTTATAACAATC           |
| Sc 656             | CACCTATAGTATAAGTTAGCAG            |
| Sc 682             | ATAATAATAATATATATATAAATAAAGATAGGC |
| Sc 754             | ATTTATCAGTTATATATAAACCTCC         |
| Sc 805             | CGGCTCACGCAATATC                  |
| Sc 866             | CCCGATAGGTAGACCTTTAC              |
| Sc -6              | GAAAATAGCACCCATTGATAATAC          |

<sup>a</sup> Except for Sc -6, which binds to the downstream exon, all oligos anneal to the intron.

©2010 Landes Bioscience.  
Do not distribute.
